# Supplementary material
Source: ML conference proceedings conference paper supplement (https://proceedings.neurips.cc/paper_files/paper/2021/hash/c8461bf13fca8a2b9912ab2eb1668e4b-Abstract.html)
Supplement: Supplementary file 1 [file c8461bf13fca8a2b9912ab2eb1668e4b-Supplemental.zip]

Archive with 3 entries (3 files):
- offchkpAppendixProofs.pdf
- __MACOSX/._offchkpAppendixProofs.pdf
- offchkpcode.tgz
